# Supplementary material for: Embryonic temperature affects muscle fibre recruitment in adult zebrafish: genome-wide changes in gene and microRNA expression associated with the transition from hyperplastic to hypertrophic growth phenotypes
Source: Oxford University Press journal article supplement (doi:10.1242/jeb.029918), 2009-05-29
Supplement: jeb029918tables1.pdf [file jeb029918tables1.pdf]

Table S1. MicroRNA (miRNA) and U6 probe sequences (5'–3', antisense) used for the validation of microarray results by northern blotting

| Down-regulated miRNAs | Primer sequence                | Up-regulated miRNAs | Primer sequence               |
|-----------------------|--------------------------------|---------------------|-------------------------------|
| Dre-miR-9*            | ACT TTC GGT TAT CTA GCT TTA    | Dre-miR-150         | CAC TGG TAC AAG GAT TGG GAG A |
| Dre-miR-18c           | TAA CTA CAC AAG ATG CAC CTT A  | Dre-let-7h          | AAC AAC ACA ACT TAC TAC CTC A |
| Dre-miR-10d           | CAC ACA TTC GGT TCT ACA GGG TA | Dre-let-7e          | AAC TAT TCA ATC TAC TAC CTC A |
| Dre-miR-130c          | ATG CCC TTT TAA TAT TGC ACT G  | Dre-miR-193a        | ACT GGG ACT TTG TAG GCC AGT T |
| U6 RNA                | AUA UGG AAC GCU UCA CGA AUU    | Dre-let-7b          | AAC CAC ACA ACC TAC TAC CTC A |
|                       |                                | Dre-miR-22b         | ACA GCT CTT CAA CTG GCA GCT T |
|                       |                                | Dre-let-7j          | AAC TGT ACA AAC AAC TAC CTC A |
|                       |                                | Dre-let-7g          | AAC TAT ACA AAC TAC TAC CTC A |
|                       |                                | Dre-miR-30e*        | GCT GCA AAC ATC CGA CTG AAA G |
