# Supplementary material for: Embryonic temperature affects muscle fibre recruitment in adult zebrafish: genome-wide changes in gene and microRNA expression associated with the transition from hyperplastic to hypertrophic growth phenotypes
Source: Oxford University Press journal article supplement (doi:10.1242/jeb.029918), 2009-05-29
Supplement: jeb029918tables2.pdf [file jeb029918tables2.pdf]

Table S2. Primer sequences for qPCR validation and *in situ* hybridisation experiments

| Gene              | Primer sequence              | Direction         | Assay          | $T_m$ (°C) | Exon spanning? | Product size (bp) |
|-------------------|------------------------------|-------------------|----------------|------------|----------------|-------------------|
| <i>asporin</i>    | GTTCTCCAGTGCTCAGATCAGGGTC    | Sense (5'–3')     | qPCR           | 69         | Yes            | 144               |
|                   | CAAGGCATAGAGATTATCCAGGC      | Antisense (5'–3') |                | 60         | Yes            |                   |
| <i>b2m</i>        | GCGTTGCCTTACCCCCAGA          | Sense (5'–3')     | qPCR           | 64         | No             | 137               |
|                   | GAATCCATCGCTCCATCGTCC        | Antisense (5'–3') |                | 64         | Yes            |                   |
| <i>beta-actin</i> | CCCAAACCCAAGTTCAGCC          | Sense (5'–3')     | qPCR           | 60         | Yes            | 112               |
|                   | GAAGACAGCACGGGGAGCA          | Antisense (5'–3') |                | 62         | No             |                   |
| <i>cd9l</i>       | TCCAGCAGTTTTACACGCAGACCG     | Sense (5'–3')     | qPCR           | 68         | No             | 201               |
|                   | CTGAATGACAGATGAGCAGCCCGTT    | Antisense (5'–3') |                | 68         | Yes            |                   |
| <i>hifan</i>      | CAAGGCGGGAAAGGAAGAGTGTA      | Sense (5'–3')     | qPCR           | 65         | Yes            | 199               |
|                   | GTTGCTCGTCATAGTGTGCTGGTG     | Antisense (5'–3') |                | 65         | No             |                   |
| <i>myf5</i>       | CGCAGGCTGAAGAAGGTCAATC       | Sense (5'–3')     | qPCR           | 63         | No             | 231               |
|                   | GCAGTCAACCATGCTCTCTGAG       | Antisense (5'–3') |                | 60         | Yes            |                   |
| <i>myhz1(1)</i>   | GGAGGCTGAGGAGCGTGCTGATATAG   | Sense (5'–3')     | qPCR           | 69         | No             | 118               |
|                   | GTCACAGTTGTTGAACGTCGTTTACTC  | Antisense (5'–3') |                | 64         | No             |                   |
| <i>myhz1(2)</i>   | AAGAGCCGTGACAGTGGAAGGGA      | Sense (5'–3')     | qPCR           | 61         | Yes            | 85                |
|                   | TTCATATACAAATGGGAGTTGGAGAC   | Antisense (5'–3') |                | 61         | No             |                   |
| <i>myhz1(3)</i>   | TGAAGTTGAGGCAGAGCAGAGAC      | Sense (5'–3')     | <i>in situ</i> | 60         | No             | 411               |
|                   | GAAGGTAAGGTTTATTGACCATTAGCAC | Antisense (5'–3') |                | 61         | No             |                   |
| <i>myhz2</i>      | AAGAGCCGTGACAGTGGAAGGG       | Sense (5'–3')     | qPCR           | 67         | Yes            | 86                |
|                   | TCACAGTTTAGAGGTGTGCTGAAGC    | Antisense (5'–3') |                | 67         | No             |                   |
| <i>myhz4(1)</i>   | GGAGGCTGAGGAGCGTGCTGATATTG   | Sense (5'–3')     | qPCR           | 71         | No             | 113               |
|                   | CCTTCCTTCAGGTTTAAAGGCTTTAC   | Antisense (5'–3') |                | 65         | No             |                   |
| <i>myhz4(2)</i>   | TTCGTGAGCTTGAGAGTGAAGTTGAG   | Sense (5'–3')     | qPCR           | 64         | No             | 383               |
|                   | GGAGCTTCTATTCGGGTTTAAAGATTCT | Antisense (5'–3') |                | 65         | Yes            |                   |
| <i>myoz1</i>      | TCGTGAGCTTGAGAGCGAAATC       | Sense (5'–3')     | qPCR           | 62         | No             | 371               |
|                   | AGAGCCTTCCTTTGAGTTAAAGAGTTC  | Antisense (5'–3') |                | 62         | No             |                   |
| <i>pvalb4</i>     | GCAGAGAAGGAAAAGAGACGACG      | Sense (5'–3')     | qPCR           | 61         | No             | 161               |
|                   | CTTCTATTGAAGCTCTTGACTTGGG    | Antisense (5'–3') |                | 61         | Yes            |                   |
| <i>rpl13</i>      | CGGGATTGATGAGTTCGCTGCC       | Sense (5'–3')     | qPCR           | 68         | Yes            | 105               |
|                   | GATGAAAATGGGAGGTGTTGGGA      | Antisense (5'–3') |                | 65         | No             |                   |
| <i>tnni2</i>      | AAAATTGTGGTGGTGAGGTGTG       | Sense (5'–3')     | qPCR           | 62         | No             | 183               |
|                   | GGTTTTGTGTGGAAGCATACCTCT     | Antisense (5'–3') |                | 60         | Yes            |                   |
| <i>tyrp1b</i>     | GGAGGAGTCTGTAGAACAGGTGCGCG   | Sense (5'–3')     | qPCR           | 70         | Yes            | 171               |
|                   | GGTTTACAGGACAGAAAGATGTTTGGC  | Antisense (5'–3') |                | 66         | No             |                   |
| <i>zgc:64006</i>  | GCAACAACACAGAATCCAGTCCA      | Sense (5'–3')     | qPCR           | 62         | Yes            | 264               |
|                   | TCTGACCACCTGTGCCATTGAG       | Antisense (5'–3') |                | 63         | No             |                   |
| <i>zgc:64006</i>  | CACCTTCAAGAGCTTCCTCAGATC     | Sense (5'–3')     | qPCR           | 61         | Yes            | 169               |
|                   | GTCGATATTCACCTCTTTGGGC       | Antisense (5'–3') |                | 61         | No             |                   |
